# Supplementary material
Source: ML conference proceedings conference paper supplement (https://proceedings.neurips.cc/paper_files/paper/2018/hash/73fed7fd472e502d8908794430511f4d-Abstract.html)
Supplement: Supplementary file [file 73fed7fd472e502d8908794430511f4d-Supplemental.zip]

---

# Supplementary Material for Causal Inference via Kernel Deviance Measures

---

## 1 Algorithmic description of the KCDC Method

---

### Algorithm 1 KCDC Algorithm

---

**Input:** Realizations  $\{(x_i, y_i)\}_{i=1}^n$  of  $(X, Y)$

**Output:** Causal direction ( $X \rightarrow Y$  vs.  $Y \rightarrow X$ )

Determine causal direction using one of the following

- (A) Compute  $S_{X \rightarrow Y}$  and  $S_{Y \rightarrow X}$  with Algorithm 2  
Perform direct comparison with decision rule  $D_1$
  - (B) Compute  $S_{X \rightarrow Y}$  and  $S_{Y \rightarrow X}$  with Algorithm 2 for model hyperparameters  $\{H_j\}_j$   
Perform majority voting with decision rule  $D_2$
  - (C) Compute  $S_{X \rightarrow Y}$  and  $S_{Y \rightarrow X}$  with Algorithm 2 for model hyperparameters  $\{H_j\}_j$   
Build data representation with  $\{S_{X \rightarrow Y}^{H_j}, S_{Y \rightarrow X}^{H_j}\}_j$   
Train Classifier using synthetic data and use decision rule  $D_3$
- 

---

### Algorithm 2 Compute KCDC Measures

---

**Input:** Realizations  $\{(x_i, y_i)\}_{i=1}^n$  of  $(X, Y)$ , model hyperparameters  $H_j$

**Output:** KCDC measures  $S_{X \rightarrow Y}$  and  $S_{Y \rightarrow X}$

**for**  $i = 1, \dots, n$  **do**

    Embed  $\{p(Y|X = x_i)\}_{i=1}^n$  and  $\{p(X|Y = y_i)\}_{i=1}^n$  using model hyperparameters  $H_j$

**end for**

Compute  $S_{X \rightarrow Y}$  and  $S_{Y \rightarrow X}$

---

## 2 Experimental results for synthetic datasets

Table 3: Classification Accuracies over 100 synthetic datasets across different functional interactions between the response and the covariates (A)-(C), different interaction patterns between the noise and the covariates (additive, multiplicative and complex) and different noise regimes;  $\mathcal{N}$  denotes  $\epsilon \sim \mathcal{N}$ ,  $\mathcal{U}$  denotes  $\epsilon \sim \mathcal{U}(0, 1)$  and Exp denotes  $\epsilon \sim \text{Exp}(1)$ .

|        | Additive Noise |               |             | Multiplicative Noise |               |             | Complex Noise |               |             |
|--------|----------------|---------------|-------------|----------------------|---------------|-------------|---------------|---------------|-------------|
| (A)    | $\mathcal{N}$  | $\mathcal{U}$ | Exp         | $\mathcal{N}$        | $\mathcal{U}$ | Exp         | $\mathcal{N}$ | $\mathcal{U}$ | Exp         |
| LiNGAM | 26%            | 87%           | 28%         | 20%                  | 30%           | 5%          | 0%            | 2%            | 0%          |
| ANM    | <b>100%</b>    | <b>100%</b>   | <b>100%</b> | 0%                   | 0%            | 1%          | 28%           | 26%           | 24%         |
| PNL    | 53%            | 14%           | 47%         | 52%                  | 24%           | 30%         | 55%           | 50%           | 48%         |
| IGCI   | 52%            | 52%           | 94%         | <b>100%</b>          | 89%           | <b>100%</b> | <b>100%</b>   | 85%           | <b>100%</b> |
| KCDC   | <b>100%</b>    | <b>100%</b>   | <b>100%</b> | <b>100%</b>          | <b>100%</b>   | <b>100%</b> | 98%           | <b>92%</b>    | <b>100%</b> |
| (B)    | $\mathcal{N}$  | $\mathcal{U}$ | Exp         | $\mathcal{N}$        | $\mathcal{U}$ | Exp         | $\mathcal{N}$ | $\mathcal{U}$ | Exp         |
| LiNGAM | 4%             | 40%           | 4%          | 10%                  | 22%           | 4%          | 31%           | 32%           | 23%         |
| ANM    | 94%            | 97%           | 79%         | 8%                   | 30%           | 12%         | 16%           | 54%           | 6%          |
| PNL    | 54%            | 33%           | 46%         | 49%                  | 58%           | 32%         | 56%           | 50%           | 72%         |
| IGCI   | 54%            | 68%           | 96%         | <b>100%</b>          | 89%           | <b>100%</b> | 88%           | 72%           | 97%         |
| KCDC   | <b>100%</b>    | <b>100%</b>   | <b>100%</b> | <b>100%</b>          | <b>100%</b>   | <b>100%</b> | <b>100%</b>   | <b>100%</b>   | <b>100%</b> |
| (C)    | $\mathcal{N}$  | $\mathcal{U}$ | Exp         | $\mathcal{N}$        | $\mathcal{U}$ | Exp         | $\mathcal{N}$ | $\mathcal{U}$ | Exp         |
| LiNGAM | 25%            | 32%           | 18%         | 0%                   | 3%            | 0%          | 0%            | 0%            | 1%          |
| ANM    | 98%            | <b>100%</b>   | 97%         | 5%                   | 1%            | 0%          | 31%           | 19%           | 37%         |
| PNL    | 39%            | 27%           | 36%         | 55%                  | 41%           | 30%         | 95%           | 92%           | 92%         |
| IGCI   | 98%            | <b>100%</b>   | 99%         | <b>100%</b>          | 99%           | <b>100%</b> | 97%           | 98%           | 98%         |
| KCDC   | <b>100%</b>    | <b>100%</b>   | <b>100%</b> | <b>100%</b>          | <b>100%</b>   | <b>100%</b> | <b>100%</b>   | <b>100%</b>   | <b>100%</b> |
